# Supplementary material for: Strong Mutational Bias Toward Deletions in the Drosophila melanogaster Genome Is Compensated by Selection
Source: PubMed Central journal article supplement — Genome Biol Evol. 2013 Feb 9;5(3):514–24. doi: 10.1093/gbe/evt021 (PMC3622295; doi:10.1093/gbe/evt021), 2013-02-09
Supplement: supp_evt021_supplementary_figures.pdf [file supp_evt021_supplementary_figures.pdf]

## Supplementary figures

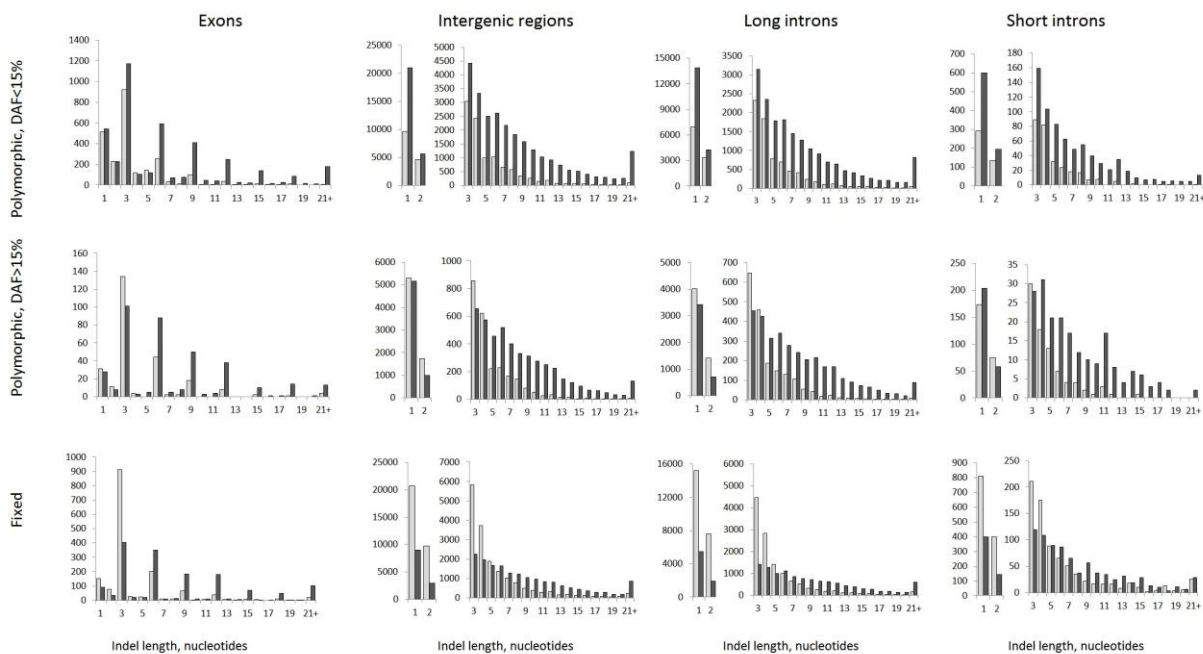

**Figure S1.** Length distribution of polymorphic and fixed indels and single-nucleotide substitutions in genome compartments of different kinds. Top row (A–D), polymorphisms with  $DAF < 15\%$ ; middle row (E–H), polymorphisms with  $DAF > 15\%$ ; bottom row (I–L), fixed mutations. A, E, I: exons (inframe indels and missense substitutions); B, F, J: intergenic regions; C, G, K: long ( $>300$  nucleotides) introns; D, H, L: short (70–300 nucleotides) introns. Light gray, insertions; dark gray, deletions.

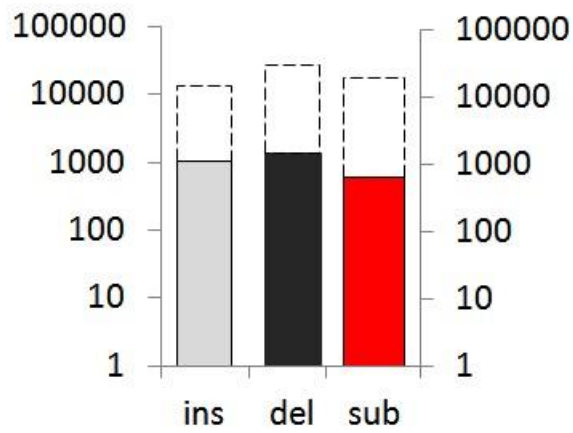

**Figure S2.** Number of frameshifting polymorphic indels and stop-codon inducing polymorphic single-nucleotide substitutions with  $DAF < 15\%$ . Light gray, insertions; dark gray, deletions; red, nonsense substitutions. Broken lines show the expected values if polymorphism and the rate of divergence in the compartment were the same as in the short introns.

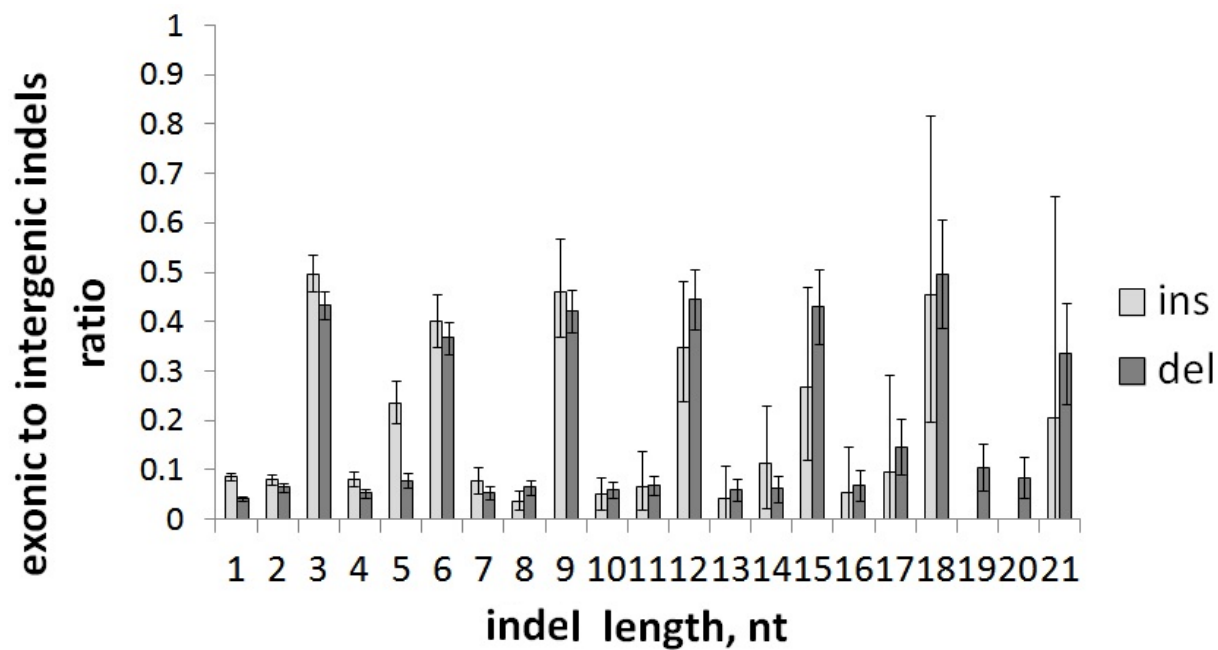

**Figure S3** Ratio of low-frequency (DAF < 15%) indels in exons to low-frequency indels in intergenic regions. Error bars are 95% confidence intervals based on 1000 bootstrap trials.
